# Supplementary material for: Do Living Mulches or Environmental Conditions Have a Greater Impact on the External Quality of the Apple Fruit ‘Chopin’ Cultivar?
Source: MDPI journal article supplement (doi:10.3390/agriculture14040610), 2024-04-12
Supplement: s1 [file s1]

**Table S1.** Mean temperatures and total precipitation at the Wrocław-Strachowice Station (51°12' N. 16°87' E) in the years 2016–2021.

2016–2021.

| Year               | Month |      |      |      |      |       |       |      |      |      |      |      | Mean or<br>sum<br>Jan-Dec |
|--------------------|-------|------|------|------|------|-------|-------|------|------|------|------|------|---------------------------|
|                    | Jan   | Feb  | Mar  | Apr  | May  | Jun   | Jul   | Aug  | Sep  | Oct  | Nov  | Dec  |                           |
| Temperature (°C)   |       |      |      |      |      |       |       |      |      |      |      |      |                           |
| 2016               | -0.4  | 5.1  | 4.4  | 8.8  | 15.0 | 18.8  | 19.7  | 18.4 | 16.9 | 8.5  | 3.6  | 1.5  | 10.0                      |
| 2017               | -3.0  | 1.2  | 7.0  | 8.0  | 14.3 | 18.7  | 19.3  | 19.5 | 13.2 | 11.0 | 5.6  | 3.1  | 9.8                       |
| 2018               | 3.0   | -2.0 | 1.6  | 13.5 | 17.0 | 19.1  | 20.2  | 21.4 | 16.2 | 11.0 | 5.2  | 3.0  | 10.8                      |
| 2019               | -0.1  | 3.4  | 6.9  | 10.6 | 11.9 | 22.3  | 19.8  | 20.9 | 14.8 | 11.1 | 7.2  | 3.7  | 11.0                      |
| 2020               | 2.5   | 5.3  | 5.3  | 10.0 | 11.8 | 17.3  | 18.7  | 20.5 | 15.5 | 11.2 | 5.8  | 2.5  | 10.6                      |
| 2021               | -0.2  | -0.3 | 4.2  | 6.4  | 12.2 | 20.0  | 20.5  | 17.7 | 15.4 | 10.1 | 5.4  | 0.9  | 9.4                       |
| Precipitation (mm) |       |      |      |      |      |       |       |      |      |      |      |      |                           |
| 2016               | 41.8  | 46.5 | 50.8 | 51.0 | 44.8 | 69.4  | 115.2 | 23.1 | 41.0 | 86.6 | 43.2 | 29.7 | 643.1                     |
| 2017               | 14.5  | 21.3 | 35.3 | 61.8 | 28.3 | 58.1  | 148.0 | 46.2 | 65.1 | 75.2 | 35.3 | 30.2 | 619.3                     |
| 2018               | 17.6  | 1.9  | 30.8 | 25.3 | 41.2 | 62.8  | 100.8 | 16.8 | 45.9 | 34.7 | 15.4 | 48.2 | 441.4                     |
| 2019               | 48.5  | 26.7 | 31.1 | 37.1 | 49.7 | 25.1  | 35.0  | 42.1 | 53.0 | 30.6 | 34.8 | 17.1 | 430.8                     |
| 2020               | 8.2   | 61.8 | 14.1 | 26.0 | 85.4 | 262.4 | 40.5  | 74.9 | 94.2 | 99.9 | 22.8 | 18.2 | 808.4                     |
| 2021               | 43.5  | 19.1 | 22.6 | 48.0 | 65.2 | 49.7  | 110.1 | 74.8 | 24.2 | 8.8  | 30.2 | 44.1 | 540.3                     |

**Table S2.** Fruit number and yield of ‘Chopin’ cv. depending on blue fescue or red fescue living mulch sods and herbicide fallow – experiment 1, in the individual years since 2017 up to 2021 (mean  $\pm$  SD, n=4).

| Fallow – experiment 1, in the individual years since 2017 up to 2021 (mean $\pm$ SD, n=4). |                    |                                                                        |                   |                   |                   |
|--------------------------------------------------------------------------------------------|--------------------|------------------------------------------------------------------------|-------------------|-------------------|-------------------|
| Year                                                                                       | Herbicide fallow   | Grass living mulch species and seed sowing dose (kg·ha <sup>-1</sup> ) |                   |                   |                   |
|                                                                                            |                    | Blue fescue                                                            |                   | Red fescue        |                   |
|                                                                                            |                    | 50                                                                     | 150               | 50                | 150               |
| Fruit number (no·tree <sup>-1</sup> )                                                      |                    |                                                                        |                   |                   |                   |
| 2017                                                                                       | 6 $\pm$ 5 a        | 6 $\pm$ 3 a                                                            | 7 $\pm$ 4 a       | 5 $\pm$ 2 a       | 3 $\pm$ 1 a       |
| 2018                                                                                       | 22 $\pm$ 11 a      | 15 $\pm$ 4 a                                                           | 14 $\pm$ 6 a      | 12 $\pm$ 2 a      | 10 $\pm$ 7 a      |
| 2019                                                                                       | 14 $\pm$ 9 a       | 22 $\pm$ 18 a                                                          | 19 $\pm$ 7 a      | 12 $\pm$ 2 a      | 14 $\pm$ 8 a      |
| 2020                                                                                       | 106 $\pm$ 28 b     | 51 $\pm$ 20 a                                                          | 45 $\pm$ 17 a     | 48 $\pm$ 20 a     | 33 $\pm$ 25 a     |
| 2021                                                                                       | 98 $\pm$ 70 a      | 56 $\pm$ 45 a                                                          | 49 $\pm$ 23 a     | 46 $\pm$ 31 a     | 48 $\pm$ 34 a     |
| Yield (kg·tree <sup>-1</sup> )                                                             |                    |                                                                        |                   |                   |                   |
| 2017                                                                                       | 0.80 $\pm$ 0.81 a  | 0.82 $\pm$ 0.46 a                                                      | 0.73 $\pm$ 0.43 a | 0.53 $\pm$ 0.27 a | 0.30 $\pm$ 0.16 a |
| 2018                                                                                       | 3.00 $\pm$ 1.44 a  | 1.94 $\pm$ 0.32 a                                                      | 1.95 $\pm$ 0.76 a | 1.69 $\pm$ 0.31 a | 1.39 $\pm$ 1.09 a |
| 2019                                                                                       | 1.61 $\pm$ 0.90 a  | 2.62 $\pm$ 2.11 a                                                      | 2.19 $\pm$ 0.78 a | 1.52 $\pm$ 0.26 a | 1.69 $\pm$ 1.04 a |
| 2020                                                                                       | 10.27 $\pm$ 3.64 b | 6.01 $\pm$ 1.69 ab                                                     | 5.35 $\pm$ 1.48 a | 5.13 $\pm$ 1.25 a | 3.95 $\pm$ 2.62 a |
| 2021                                                                                       | 11.06 $\pm$ 6.78 a | 7.45 $\pm$ 4.89 a                                                      | 6.45 $\pm$ 2.66 a | 5.41 $\pm$ 1.86 a | 5.01 $\pm$ 2.21 a |

Mean marked with different letter in rows represent statistically differences among treatments (one way ANOVA, Tukey test,  $p \leq 0.05$ ).

**Table S3.** Fruit number and yield of ‘Chopin’ cv. depending on meadow grass or perennial ryegrass living mulch sod and herbicide fallow – experiment 2, in the individual years since 2017 up to 2021 (mean  $\pm$  SD, n=4).

| Year                                  | Herbicide fallow | Grass living mulch species and seed sowing dose (kg·ha <sup>-1</sup> ) |                |                    |                |
|---------------------------------------|------------------|------------------------------------------------------------------------|----------------|--------------------|----------------|
|                                       |                  | Meadow grass                                                           |                | Perennial ryegrass |                |
|                                       |                  | 50                                                                     | 150            | 50                 | 150            |
| Fruit number (no·tree <sup>-1</sup> ) |                  |                                                                        |                |                    |                |
| 2017                                  | 3 ± 3 a          | 5 ± 3 a                                                                | 6 ± 4 a        | 3 ± 3 a            | 7 ± 3 a        |
| 2018                                  | 11 ± 6 b         | 5 ± 4 ab                                                               | 6 ± 5 ab       | 4 ± 3 ab           | 1 ± 1 a        |
| 2019                                  | 21 ± 8 a         | 21 ± 6 a                                                               | 20 ± 5 a       | 11 ± 11 a          | 19 ± 2 a       |
| 2020                                  | 90 ± 31 b        | 23 ± 14 a                                                              | 15 ± 7 a       | 24 ± 18 a          | 5 ± 4 a        |
| 2021                                  | 110 ± 32 b       | 62 ± 24 ab                                                             | 83 ± 20 ab     | 38 ± 29 a          | 61 ± 10 ab     |
| Yield (kg·tree <sup>-1</sup> )        |                  |                                                                        |                |                    |                |
| 2017                                  | 0.33 ± 0.21 a    | 0.42 ± 0.29 a                                                          | 0.51 ± 0.38 a  | 0.26 ± 0.28 a      | 0.50 ± 0.19 a  |
| 2018                                  | 1.68 ± 0.81 b    | 0.54 ± 0.36 ab                                                         | 0.72 ± 0.59 ab | 0.43 ± 0.33 ab     | 0.11 ± 0.09 a  |
| 2019                                  | 2.31 ± 0.90 a    | 1.94 ± 0.65 a                                                          | 1.91 ± 0.33 a  | 1.17 ± 1.05 a      | 1.66 ± 0.22 a  |
| 2020                                  | 8.77 ± 2.68 b    | 1.96 ± 1.13 a                                                          | 1.59 ± 0.53 a  | 2.61 ± 1.59 a      | 0.63 ± 0.50 a  |
| 2021                                  | 12.79 ± 1.88 b   | 7.14 ± 3.37 ab                                                         | 8.58 ± 1.84 ab | 4.03 ± 3.15 a      | 6.59 n± 1.69 a |

Mean marked with different letter in rows represent statistically differences among treatments (one way ANOVA, Tukey test,  $p \leq 0.05$ ).

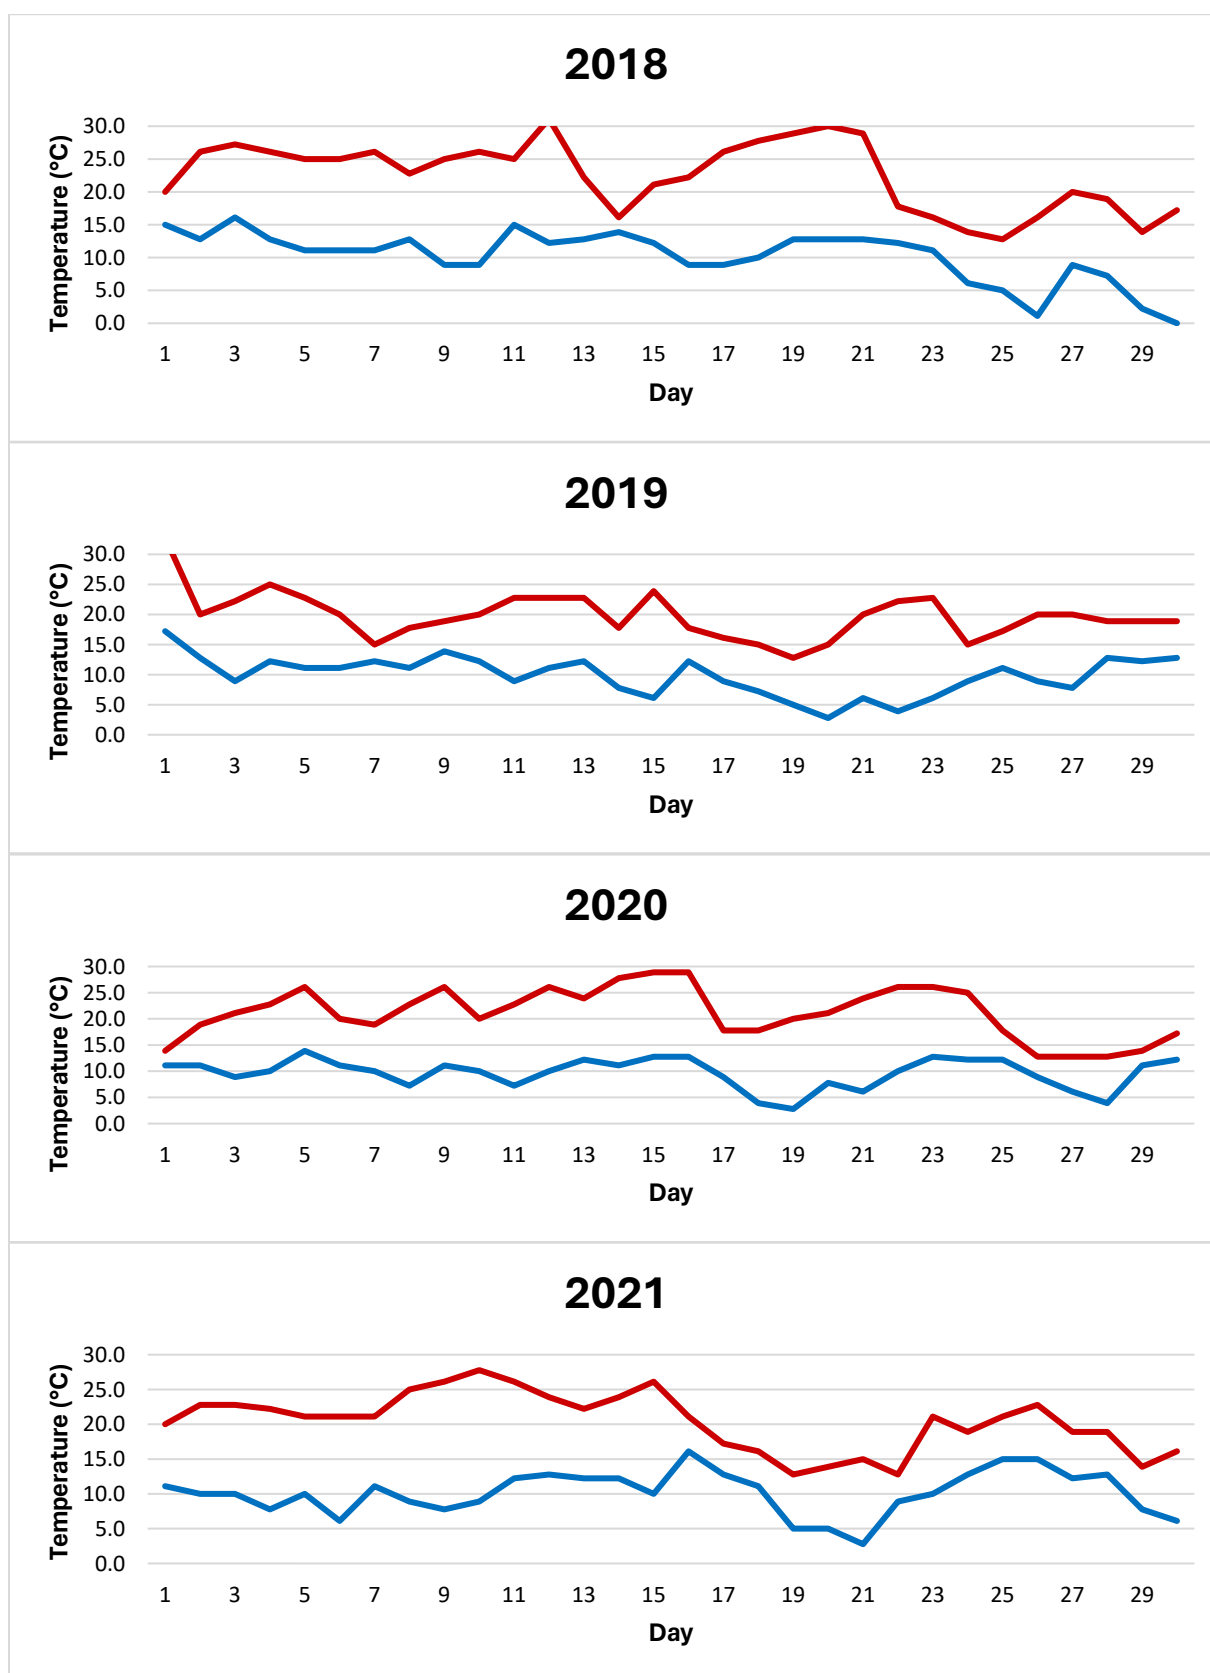

**Figure S1.** Daily minimum and maximum temperatures at the Wrocław-Strachowice Station (51°12' N. 16°87' E) in September in the years 2018–2021.

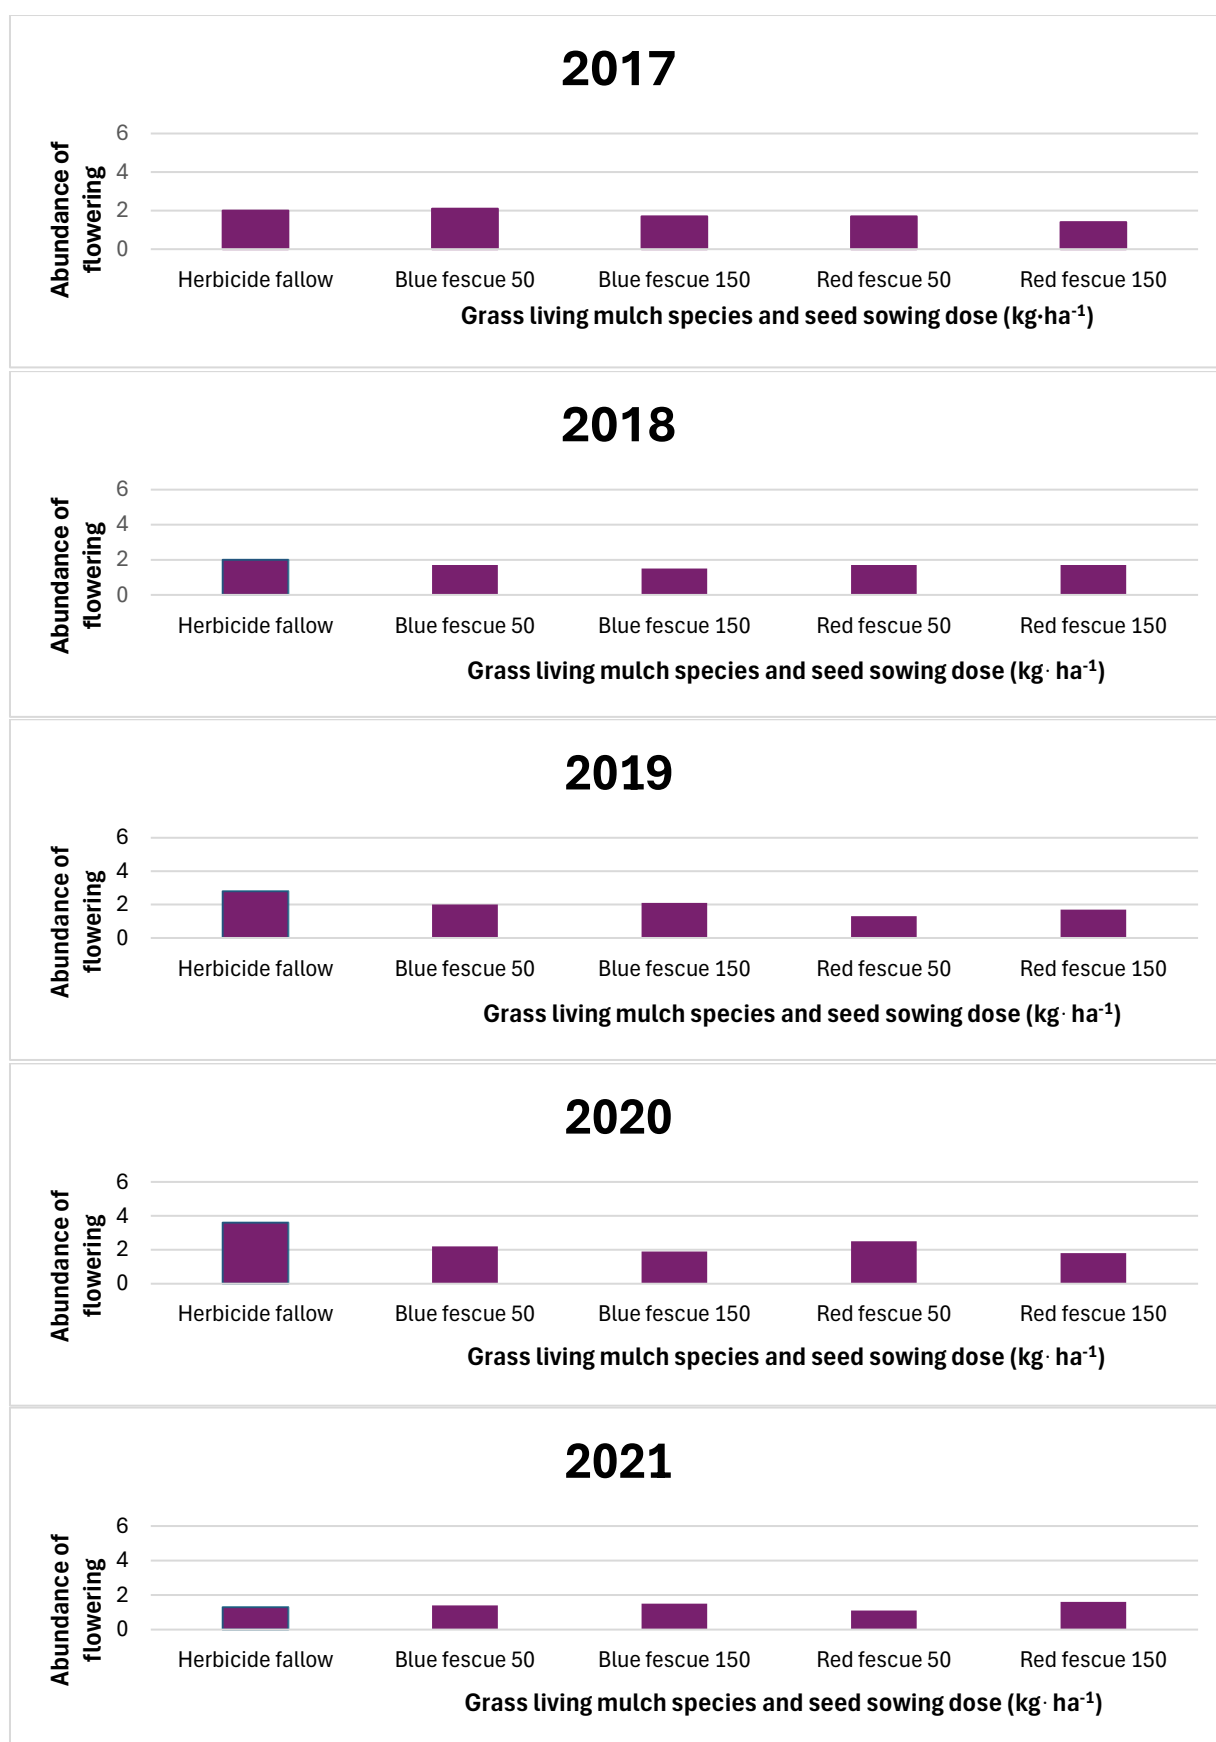

**Figure S2.** Blooming of ‘Chopin’ trees depending on blue fescue or red fescue living mulch sods and herbicide fallow – experiment 1 (scale 1–6).

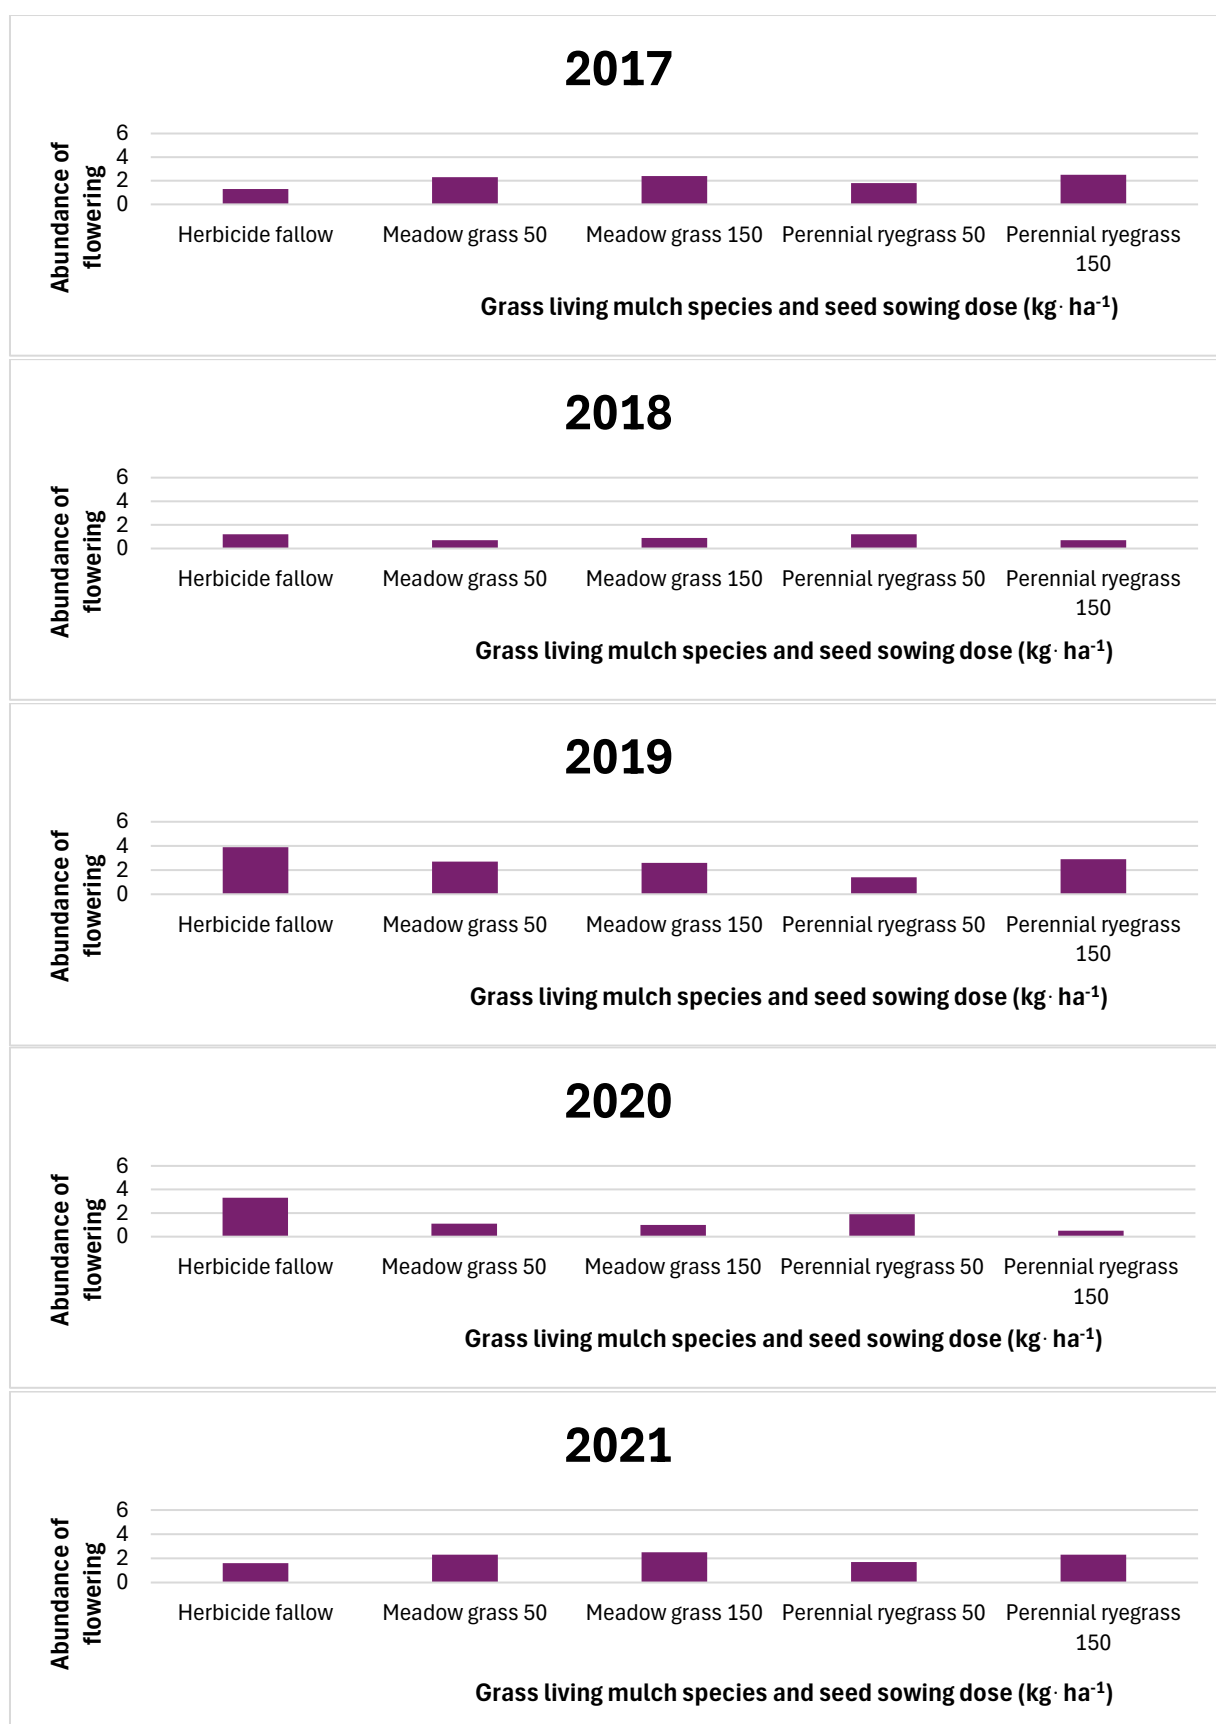

**Figure S3.** Blooming of ‘Chopin’ trees depending on meadow grass or perennial ryegrass living mulch sods and herbicide fallow – experiment 2 (scale 1–6).

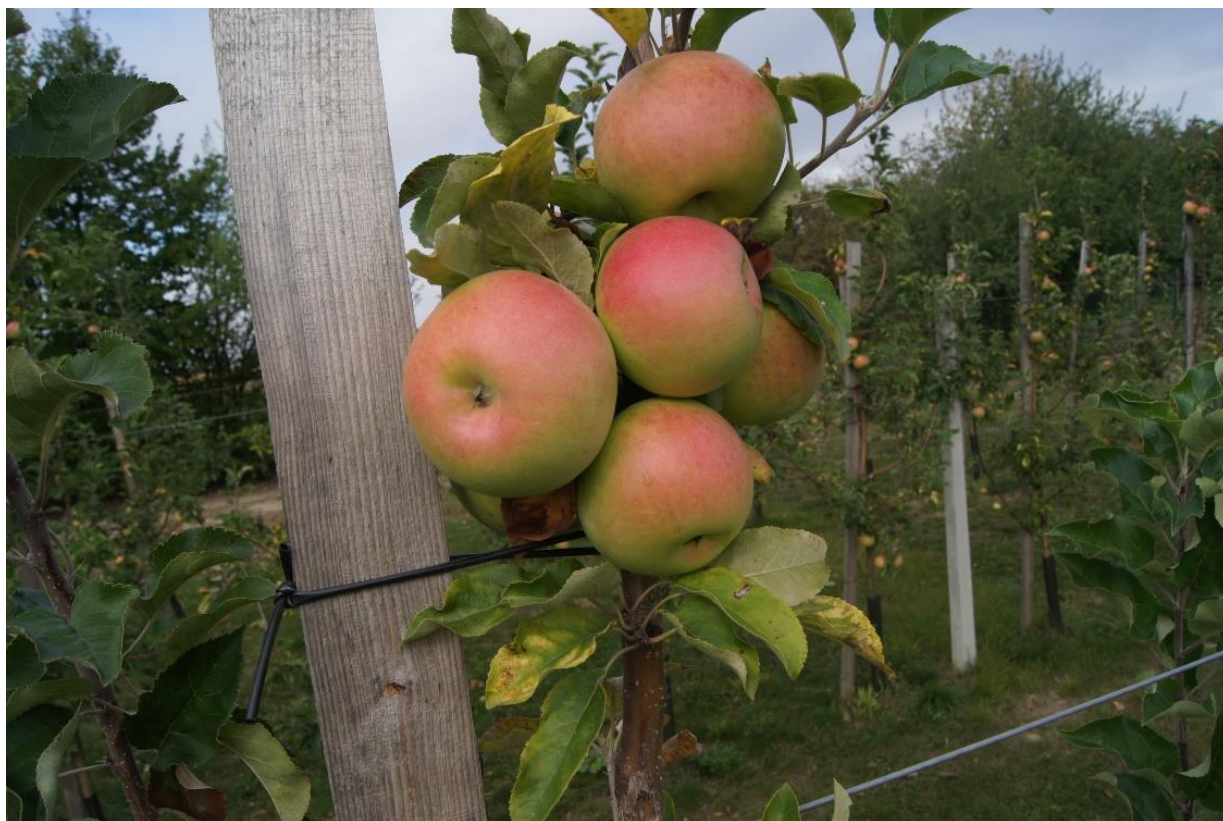

**Scheme S1.** Red-pink blushing on the fruit skin surface of the green-peel 'Chopin' cv. in autumn 2018 year.
